# Supplementary material for: Sensory neuron dysfunction in orthotopic mouse models of colon cancer
Source: PubMed Central journal article supplement (PMC9375288; doi:10.1186/s12974-022-02566-z), 2022-08-12

## Lumbar DRG Ca<sup>2+</sup> Imaging

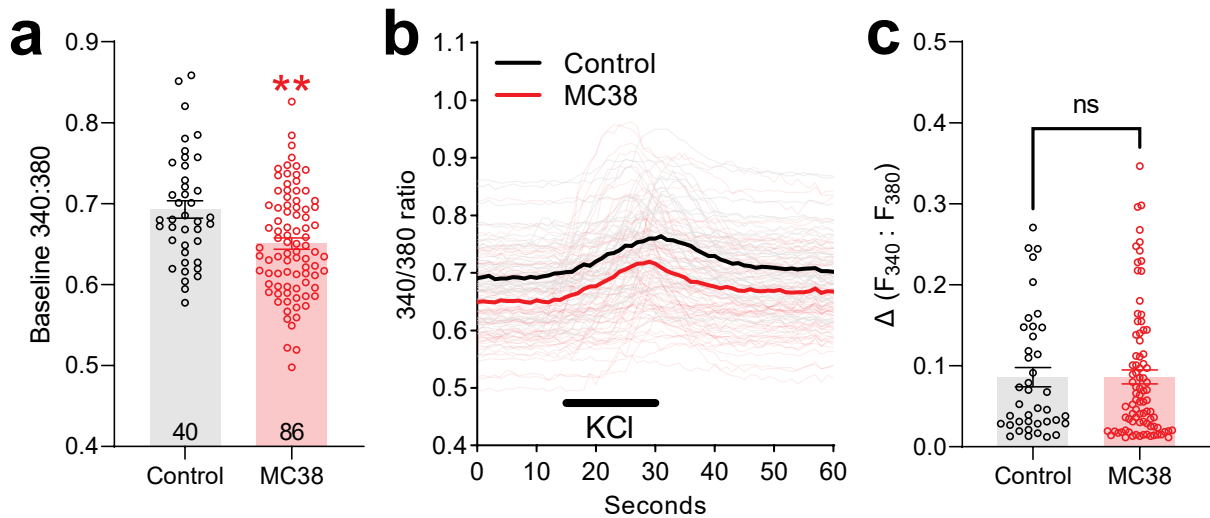

## Non-Lumbar DRG Ca<sup>2+</sup> Imaging

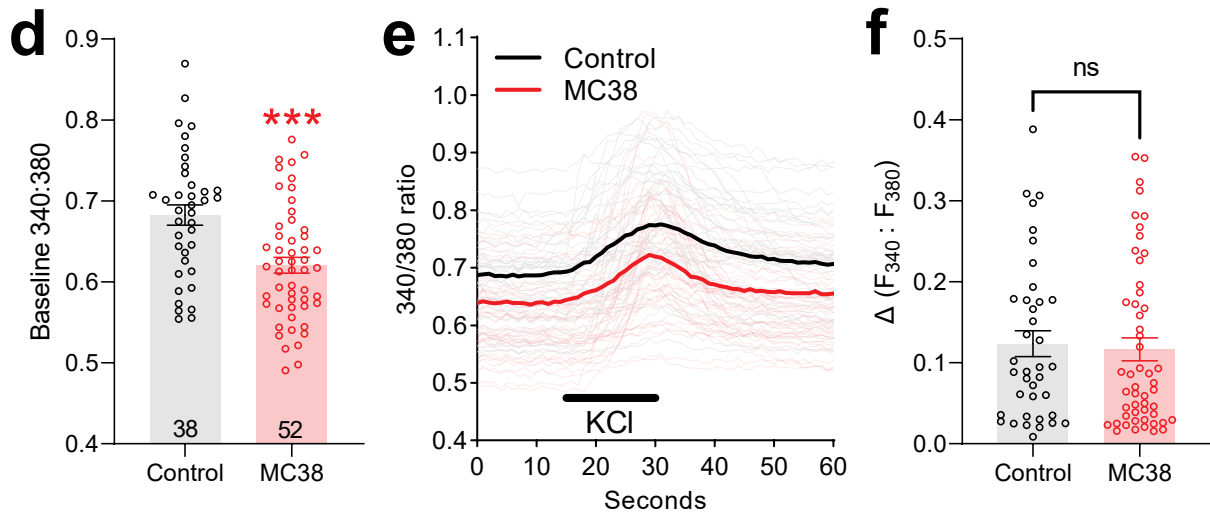

Supplement: 12974_2022_2566_MOESM3_ESM.pdf [file 12974_2022_2566_MOESM3_ESM.pdf]
