# Supplementary material for: Sensory neuron dysfunction in orthotopic mouse models of colon cancer
Source: PubMed Central journal article supplement (PMC9375288; doi:10.1186/s12974-022-02566-z), 2022-08-12

**a** Disease and Function enrichment: MC38

| Category                               | p-value (range)   | Number of genes |
|----------------------------------------|-------------------|-----------------|
| Cancer                                 | 2.86E-05-4.64E-02 | 23              |
| Dermatological Diseases and Conditions | 2.86E-05-4.64E-02 | 20              |
| Hematological Disease                  | 2.86E-05-4.26E-02 | 14              |
| Immunological Disease                  | 2.86E-05-3.47E-02 | 13              |
| Organismal Injury and Abnormalities    | 2.86E-05-4.73E-02 | 23              |

Disease and Function enrichment: Vehicle

| Category                            | p-value (range)   | Number of genes |
|-------------------------------------|-------------------|-----------------|
| Developmental Disorder              | 2.29E-10-5.79E-03 | 17              |
| Hereditary Disorder                 | 2.29E-10-6.32E-03 | 22              |
| Organismal Injury and Abnormalities | 2.29E-10-8.68E-03 | 67              |
| Respiratory Disease                 | 2.29E-10-8.68E-03 | 41              |
| Cellular Function and Maintenance   | 6.04E-09-7.57E-03 | 12              |

**b** Cancer-related genes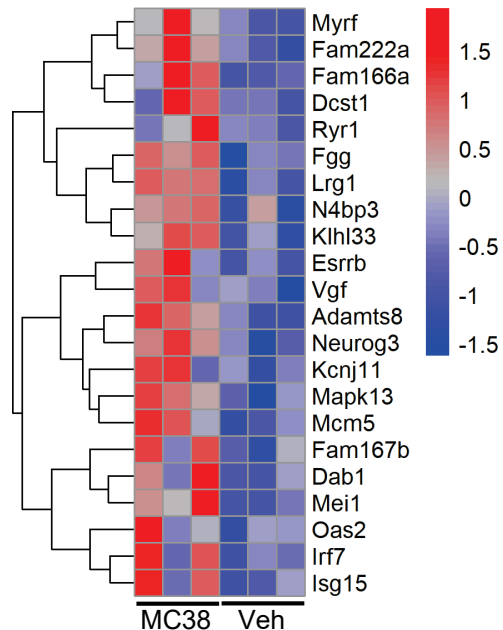

Supplement: 12974_2022_2566_MOESM4_ESM.pdf [file 12974_2022_2566_MOESM4_ESM.pdf]
